# Supplementary material for: Preoperative Assessment of Perianal Fistulas with Combined Magnetic Resonance and Tridimensional Endoanal Ultrasound: A Prospective Study
Source: MDPI journal article supplement (doi:10.3390/diagnostics13172851), 2023-09-03
Supplement: s1 [file s1]

**TABLE S1: Pelvic MRI Protocols for Perianal Fistula Evaluation**

| <b>Sequences and Slice Orientation</b>                                                                     | <b>No. of Signal Averages</b> | <b>FOV (mm)</b>  | <b>Imaging Plane Direction</b>         | <b>Acquired Matrix (Frequency × Phase)</b> | <b>Slice Thickness (mm)</b> | <b>TR/TE</b>         |
|------------------------------------------------------------------------------------------------------------|-------------------------------|------------------|----------------------------------------|--------------------------------------------|-----------------------------|----------------------|
| <b>Coronal single-shot turbo spin-echo (fast spin-echo) (localizer)</b>                                    | <b>2</b>                      | <b>340 × 380</b> | <b>Right-left × Head-foot</b>          | <b>316 × 247</b>                           | <b>5 mm 1.6gap</b>          | <b>3000–5000/180</b> |
| <b>Axial high-resolution T2-weighted turbo spin-echo (fast spin-echo)</b>                                  | <b>2</b>                      | <b>360 × 340</b> | <b>Right-left × anterior-posterior</b> | <b>800 × 759</b>                           | <b>4 mm 1gap</b>            | <b>3000–5000/80</b>  |
| <b>Sagittal T2-weighted turbo spin-echo (fast spin-echo) with fat suppression</b>                          | <b>3</b>                      | <b>200 × 200</b> | <b>Head-foot × anterior-posterior</b>  | <b>400 × 233</b>                           | <b>6 mm 1.7gap</b>          | <b>3000–5000/80</b>  |
| <b>Axial T2-weighted turbo spin-echo (fast spin-echo) with fat suppression</b>                             | <b>4</b>                      | <b>200 × 160</b> | <b>Right-left × anterior-posterior</b> | <b>256 × 133</b>                           | <b>4 mm1 gap</b>            | <b>3000–5000/80</b>  |
| <b>Axial STIR (optional)</b>                                                                               | <b>1</b>                      | <b>200 × 160</b> | <b>Right-left × anterior-posterior</b> | <b>256 × 149</b>                           | <b>4 mm1 gap</b>            | <b>2500–6000/30</b>  |
| <b>Sagittal STIR</b>                                                                                       | <b>3</b>                      | <b>200 × 200</b> | <b>Head-foot × anterior-posterior</b>  | <b>400 × 233</b>                           | <b>6 mm 1.7gap</b>          | <b>3000–5000/80</b>  |
| <b>Axial T1-weighted turbo spin-echo (fast spin-echo)</b>                                                  | <b>2</b>                      | <b>200 × 160</b> | <b>Right-left × anterior-posterior</b> | <b>400 × 226</b>                           | <b>4 mm 1gap</b>            | <b>500–800/11</b>    |
| <b>Axial T1-weighted 3D gradient-recalled echo with fat suppression with and without IV contrast agent</b> | <b>4</b>                      | <b>200 × 160</b> | <b>Right-left × anterior-posterior</b> | <b>224 × 178</b>                           | <b>1.8</b>                  | <b>3.6/1.8</b>       |
| <b>Sagittal 3D gradient-recalled echo with fat suppression</b>                                             | <b>4</b>                      | <b>200 × 160</b> | <b>Foot-head × anterior-posterior</b>  | <b>224 × 178</b>                           | <b>1.8</b>                  | <b>3.6/1.8</b>       |
